1 **A broad-host-range CRISPRi toolkit for silencing gene expression in Burkholderia**

2 Short Title: CRISPRi toolkit for Burkholderia

3

4 Andrew M. Hogan<sup>1</sup>, A. S. M. Zisanur Rahman<sup>1</sup>, Tasia J. Lightly<sup>1</sup>, Silvia T. Cardona<sup>1,2\*</sup>.

5

6 <sup>1</sup>Department of Microbiology, University of Manitoba, Winnipeg, MB, Canada.

7 <sup>2</sup>Department of Medical Microbiology & Infectious Disease, University of Manitoba, Winnipeg,  
8 Canada.

9 \*To whom correspondence should be addressed: [Silvia.Cardona@umanitoba.ca](mailto:Silvia.Cardona@umanitoba.ca)

10

11

12

13

14

15 **Abstract**

16 Genetic tools are critical to dissecting the mechanisms governing cellular processes, from  
17 fundamental physiology to pathogenesis. Members of the genus *Burkholderia* have potential for  
18 biotechnological applications but can also cause disease in humans with a debilitated immune  
19 system. The lack of suitable genetic tools to edit *Burkholderia* GC-rich genomes has hampered  
20 the exploration of useful capacities and the understanding of pathogenic features. To address  
21 this, we have developed CRISPR interference (CRISPRi) technology for gene silencing in  
22 *Burkholderia*. Tunable expression was provided by placing a codon-optimized *dcas9* from  
23 *Streptococcus pyogenes* under control of a rhamnose-inducible promoter. As a proof of concept,  
24 the *paaABCDE* operon controlling genes necessary for phenylacetic acid degradation was  
25 targeted by plasmid-borne sgRNAs, resulting in near complete inhibition of growth on  
26 phenylacetic acid as the sole carbon source. This was supported by reductions in *paaA* mRNA  
27 expression. The utility of CRISPRi to probe other functions at the single cell level was  
28 demonstrated by knocking down *phbC* and *fliF*, which dramatically reduces  
29 polyhydroxybutyrate granule accumulation and motility, respectively. As a hallmark of the mini-  
30 CTX system is the broad host-range of integration, we putatively identified 67 genera of  
31 Proteobacteria that might be amenable to modification with our CRISPRi toolkit. Our CRISPRi  
32 tool kit provides a simple and rapid way to silence gene expression to produce an observable  
33 phenotype. Linking genes to functions with CRISPRi will facilitate genome editing with the goal  
34 of enhancing biotechnological capabilities while reducing *Burkholderia*'s pathogenic arsenal.

35 **Keywords**

36 CRISPRi, *Burkholderia*, gene silencing, genetic tool

37

## 38 Author contributions

39 STC conceived the idea and design of the research; AMH designed and cloned the dCas9  
40 constructs; AMH and ASMZ designed the sgRNAs, assessed knockdown phenotypes, processed  
41 data, and wrote and edited the manuscript; TJL performed RT-qPCR analysis and edited the  
42 manuscript; STC supervised the work and provided financial support.

43

## 44 Graphical Abstract

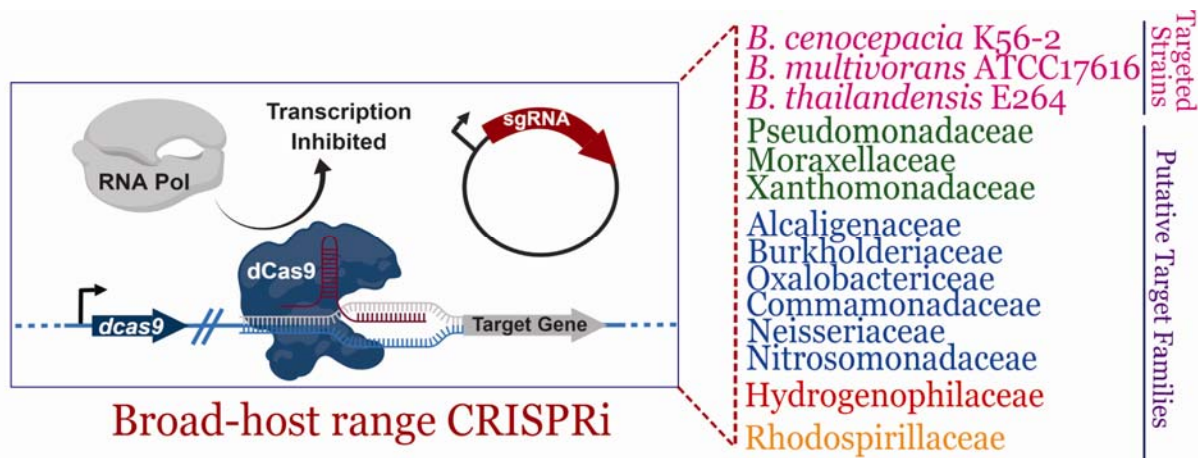

45

46

## 47 **Introduction**

48           The genus *Burkholderia* comprises a diverse group of Gram-negative bacteria  
49 characterized by a remarkable biotechnological potential, with species that can be exploited for  
50 bioremediation purposes, production of bioactive compounds, and agricultural growth  
51 promotion. Perhaps due to the phylogenetic diversity of the genus, some species of *Burkholderia*  
52 can also pose a threat to human health (Eberl and Vandamme, 2016). Within the multiple deep-  
53 branching groups of the *Burkholderia* phylogenetic tree (Depoorter et al., 2016), one branch  
54 contains the clades known as the *Burkholderia cepacia* complex (Bcc) and the *B. pseudomallei*  
55 group. The Bcc group comprises species that cause severe infections in people with the genetic  
56 disease cystic fibrosis and other patients with a compromised immune system  
57 (Mahenthiralingam et al., 2005). *B. cenocepacia* and *B. multivorans* are two relevant species of  
58 this group, which are prevalent in cystic fibrosis patients (Kenna et al., 2017). The *B.*  
59 *pseudomallei* group contains the risk group 3 members *B. mallei*, *B. pseudomallei*, and its close  
60 relative *B. thailandensis*, the last one being a frequent surrogate used in *B. pseudomallei* and *B.*  
61 *mallei* research (Howe et al., 1971). Other branches, such as the *B. xenovorans* group comprise  
62 species isolated from diverse environmental sources, like polluted soils, and plant rhizospheres  
63 (Depoorter et al., 2016). While species with and without pathogenic potential tend to cluster  
64 separately in most phylogenetic trees, the genetic characteristics that define the pathogenic  
65 potential of *Burkholderia* are poorly understood. Environmental species can cause serious  
66 infections (Nally et al., 2018), calling for caution in the use of *Burkholderia* strains for  
67 biotechnological applications. The incomplete understanding of *Burkholderia* pathogenic  
68 potential may be related to the limited tools available to link gene to function. Most genome  
69 editing methods designed for Gram-negative bacteria are inefficient in *Burkholderia* due in part

70 to their high resistance to the antibiotics used as genetic markers (Rhodes and Schweizer, 2016),  
71 and the high GC content of their large genomes.

72 Tools that facilitate controlled gene expression are necessary for interrogation of gene  
73 function. Programmable control of gene expression by promoter replacement is a valuable tool to  
74 link gene to phenotype (Judson and Mekalanos, 2000). Yet, promoter replacement implies that  
75 the natural regulatory circuitry of the target gene is interrupted. Instead, clustered regularly  
76 interspaced short palindromic repeats interference (CRISPRi) (Qi et al., 2013) is a method of  
77 silencing native gene expression, which is based on a dead Cas9 (dCas9) and a nuclease-inactive  
78 version of the RNA-guided endonuclease Cas9 (Cho et al., 2013). In CRISPRi, a single guide  
79 RNA (sgRNA) designed towards the 5' end of the target gene and the dCas9 protein form an  
80 RNA-protein complex that recognizes the target region by base-pairing, and sterically blocks  
81 transcription initiation, if targeting the promoter, or elongation if targeting downstream of the  
82 promoter, by the RNA polymerase (Qi et al., 2013). Initially developed in *Escherichia coli*,  
83 CRISPRi technology has been applied to functionally characterize genomes of a handful of  
84 bacteria (Lee et al., 2019; Liu et al., 2017; Peters et al., 2016). To achieve genome-wide control  
85 of gene expression, a wide range of dCas9 expression levels are necessary, which can be  
86 provided by expressing *dcas9* with strong inducible promoters (Peters et al., 2016) or by  
87 providing multiple copies of *dcas9* engineered in a plasmid (Lee et al., 2019). Limitations to the  
88 success of these genomic efforts are the proteotoxicity of dCas9 when expressed at high levels  
89 (Cui et al., 2018) and the necessity of customizing CRISPRi delivery tools across bacteria.  
90 Recently, the use of Tn7 transposon mutagenesis, which specifically delivers genetic constructs  
91 close to a single *glmS* site (Choi and Schweizer, 2006; Choi et al., 2005) was applied to deliver a  
92 mobile CRISPRi system across bacteria (Peters et al., 2019). However, the Tn7 system is less

93 suitable for *Burkholderia* species as their genomes contain multiple copies of *glmS*, requiring  
94 additional steps to confirm the site of chromosomal integration (Choi et al., 2006).

95 In this work, we employ a mini-CTX-derived mutagenesis system (Hoang et al., 2000) to  
96 achieve specific chromosomal delivery of *dcas9* in three species of *Burkholderia*, *B.*  
97 *cenocepacia*, *B. thailandensis* and *B. multivorans*. By placing the chromosomal copy of *dcas9*  
98 under the control of the *E. coli* rhamnose-inducible promoter (Cardona and Valvano, 2005), we  
99 demonstrate durable and tunable control of endogenous gene expression in *Burkholderia* species,  
100 which affects cellular function producing observable phenotypes. We extend the usability of our  
101 CRISPRi tool kit by exploring other bacterial genomes for putative mini-CTX insertion sites.

102

## 103 **Results**

### 104 *Construction of CRISPRi system*

105 The dCas9 from *Streptococcus pyogenes* has been shown to provide robust gene  
106 repression in diverse bacteria (Peters et al., 2016, 2019; Qi et al., 2013); we therefore selected it  
107 as our first approach. To function, the dCas9 binds a sgRNA and, by complementary base  
108 pairing, is guided to target and silences a gene of interest by sterically blocking the RNA  
109 polymerase (Qi et al., 2013). However, the genome of *S. pyogenes* has low GC-content (~40%),  
110 and from inspection of the *dcas9* gene, we expected poor codon usage in high GC-content  
111 organisms such as *Burkholderia* (67%) and subsequently low levels of expression. Indeed, we  
112 did not observe detectable levels of dCas9 by immunoblot upon expression of the native gene  
113 from *S. pyogenes* from a single copy in the *B. cenocepacia* K56-2 chromosome (Supplemental  
114 Figure 1). Upon codon optimization for *B. cenocepacia*, we first introduced the gene into a

115 multicopy plasmid under the control of the rhamnose-inducible promoter (Cardona and Valvano,  
116 2005); however, we observed a severe growth defect upon induction, except at minute  
117 concentrations of rhamnose (Supplemental Figure 2A). Growth inhibition was not observed in  
118 the vector control (Supplemental Figure 2B) and it remains unclear if the inhibitory effect of  
119 dCas9 expression on growth was caused by metabolic load from expression of a large protein in  
120 multicopy, or from proteotoxicity (Rock et al., 2017).

121 A single chromosomal copy of *dcas9* may provide sufficient levels of expression as  
122 observed previously (Choudhary et al., 2015; Peters et al., 2016, 2019). Using the mini-CTX  
123 system, we introduced a single copy of *dcas9* under control of the rhamnose-inducible promoter  
124 into *B. cenocepacia* K56-2 (Supplemental Figure 3A and B). We observed titratable dCas9  
125 expression at various levels of rhamnose by immunoblot (Figure 1A and Supplemental Figure 4).  
126 At rhamnose concentrations up to 1% there was no growth defect in K56-2::dCas9 (Figure 1B)  
127 or K56-2::dCas9 with non-genome targeting sgRNA (pgRNA-non-target) (Figure 1C) compared  
128 to the vector control mutant (Figure 1D).

### 129 *Tunable and durable CRISPRi silencing of paaA suppresses growth on phenylacetic acid*

130 To evaluate the utility of the CRISPRi system for gene repression in *B. cenocepacia* K56-  
131 2, we first chose to target the *paaA* gene, which encodes phenylacetate-CoA oxygenase subunit  
132 PaaA (Teufel et al., 2010). This gene, and the rest of the *paaABCDE* operon, enable growth with  
133 phenylacetic acid (PA) as a sole carbon source in *B. cenocepacia* K56-2 (Pribytkova et al.,  
134 2014), with the lack of growth being a clearly observable phenotype when the *paaA* gene is  
135 disrupted. In addition, as this is the first characterization of CRISPRi in *Burkholderia*, we also  
136 wished to assess the effect on repression efficiency when targeting the non-template (NT) and  
137 template (T) strands, as previous studies have demonstrated profound differences (Bikard et al.,

138 2013; Qi et al., 2013). We therefore designed five sgRNAs: three sgRNAs targeted the promoter  
139 elements and adjacent to the transcription start site (TSS) on the NT strand (sgRNA 1, 2 and 3),  
140 one sgRNA targeted near the start codon of *paaA* on the NT strand (sgRNA 4), and one sgRNA  
141 targeted near the start codon of *paaA* on the T strand (sgRNA 5) (Figure 2A).

142 For phenotypic characterization of the *paaA* mutants, we used M9 minimal medium with  
143 PA (M9+PA) as the sole carbon source. Upon induction of dCas9, the growth of all mutants  
144 (except the controls) was suppressed approximately 30-fold (Figure 2B) to the same level of a  
145  $\Delta paaABCDE$  mutant, which is unable to utilize PA as a sole carbon source (Pribytkova et al.,  
146 2014). Furthermore, in the absence of rhamnose all of the mutants grew at or near wild-type  
147 levels, suggesting that *dcas9* expression is tightly repressed in non-inducing conditions.  
148 Phenotypically, we did not observe a differential effect of placement of the sgRNA-binding site,  
149 as the growth of all mutants was suppressed equally. We also found there were no differences in  
150 control strains; mutants expressing dCas9 and either a guideless or non-targeting sgRNA  
151 displayed the same levels of growth. However, RT-qPCR demonstrated that while growth was  
152 suppressed equally in the mutants, there were sgRNA-dependent differences in gene expression  
153 levels (Figure 2C). At 0.2% rhamnose, sgRNA4, targeting near the start codon of *paaA* on the  
154 NT strand, was the most effective in suppressing *paaA* mRNA expression (~114-fold  
155 suppression), whereas sgRNA1 and sgRNA5 only had ~63-fold and ~51-fold suppression,  
156 respectively (Figure 2C). In the absence of rhamnose there was no difference in gene expression  
157 levels between the mutants and wild type confirming that the *dcas9* is tightly regulated in non-  
158 inducing conditions.

159 Next, we sought to determine the tunability of our CRISPRi system in *Burkholderia*.  
160 Tuning is useful to control the level of transcriptional inhibition when precision is required, such



161 as in the study of essential genes. To that end, we examined the growth of the dCas9 mutant of *B.*  
162 *cenocepacia* K56-2 with the sgRNA1 (targeting *paaA*), using PA as a sole carbon source in the  
163 presence of a 2-fold serial dilution of rhamnose. The results showed that our CRISPRi system is  
164 tunable, exhibiting growth reduction in a dose-dependent manner with variable repression across  
165 sub-saturating rhamnose concentrations (Figure 2D). We observed a nearly 30-fold repression in  
166 OD<sub>600nm</sub> at concentrations well below maximum induction as identified by immunoblot,  
167 suggesting our system produces more dCas9 than is required for maximum repression as  
168 observed by this phenotype. Contrary to what had been observed in rich medium (Figure 1B and  
169 C), all dCas9 mutants (with or without the sgRNA) showed a growth defect in M9+PA above  
170 0.2% rhamnose (Figure 2D). A similar phenomenon was also seen in M9+glycerol (data not  
171 shown). Intermediate levels of growth were observed in concentrations of rhamnose between  
172 0.00625% and 0.05%. For consistency, we therefore used 0.2% rhamnose for dCas9 induction in  
173 all experiments.

174 Although once rhamnose is removed from the culture, expression of dCas9 is no longer  
175 induced, it remained possible that the dCas9 already synthesized may persist and cause long-  
176 term, or durable, silencing. To address this, the mutant strains harbouring sgRNAs targeting  
177 *paaA*, were grown overnight in rich medium with 0.2% rhamnose, effectively priming the cells  
178 with dCas9. When grown in M9+PA with and without rhamnose, we again observed strong  
179 repression of growth (~30-fold) in all conditions regardless of the presence of rhamnose in the  
180 M9+PA, and at levels similar to the  $\Delta paaABCDE$  mutant (Figure 2E). This suggests that after  
181 the inducer is removed, dCas9 is either slowly degraded in K56-2 or is present at high enough  
182 levels in the cells for durable repression.

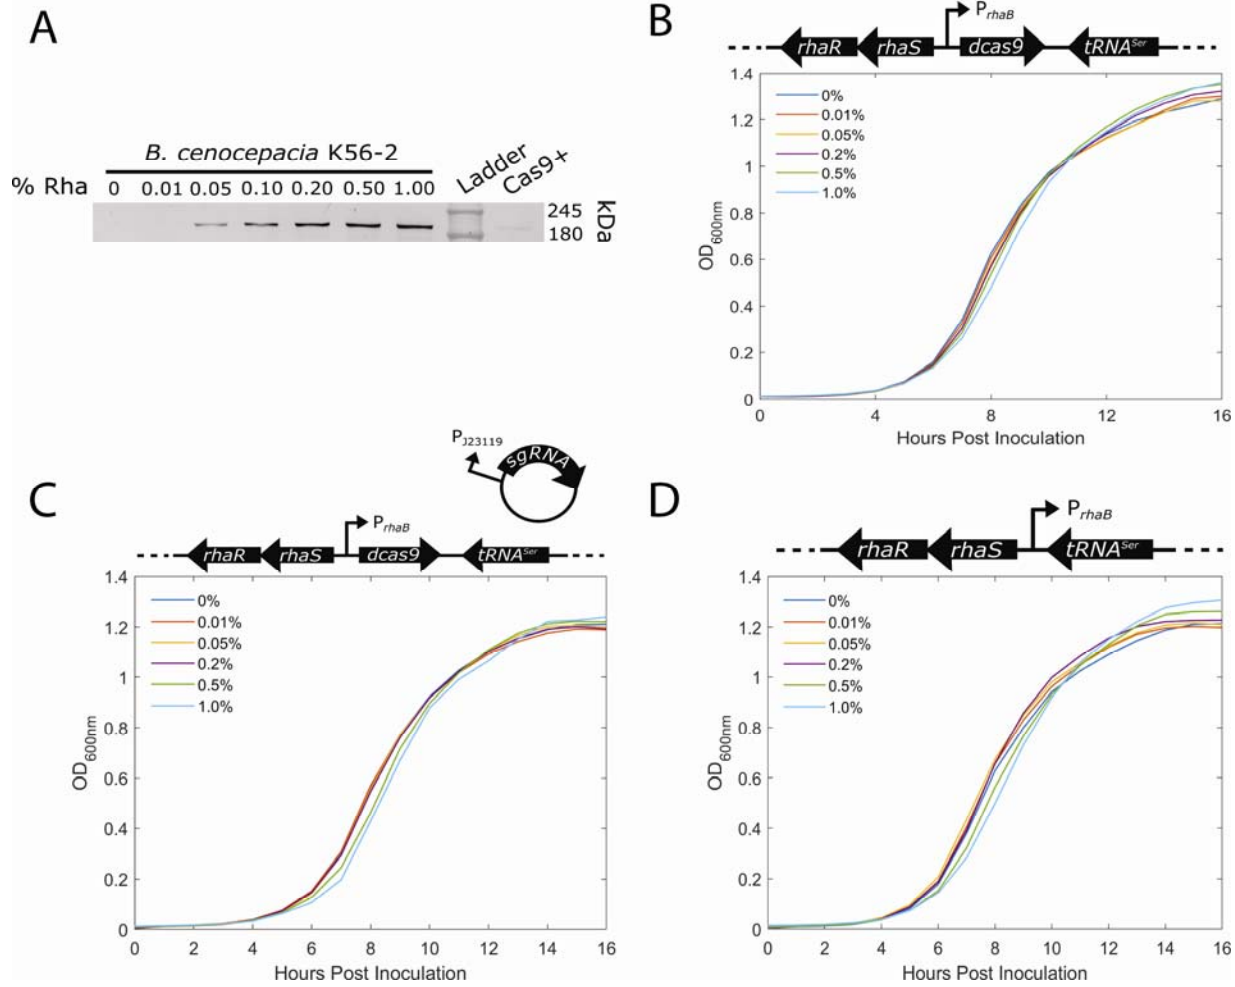

183

184 **Figure 1. Development of CRISPRi in *B. cenocepacia* K56-2.** A) dCas9 was expressed from  
 185 the chromosome of K56-2 under a rhamnose inducible promoter. Cells were grown to OD<sub>600nm</sub> of  
 186 0.6 then induced with rhamnose for three hours. The soluble protein fraction was run on an 8%  
 187 SDS gel. dCas9 was detected by an  $\alpha$ -dCas9 antibody followed by a second antibody linked to  
 188 alkaline phosphatase. B, C and D) Growth curves of *B. cenocepacia* K56-2::dCas9 (B), dCas9  
 189 expressed with a non-genome targeting sgRNA (dCas9/pgRNA-non target) (C) and K56-  
 190 2::CTX1-rha, the vector control plasmid for the integration (D) in LB media show that  
 191 expression of the chromosomally-encoded dCas9 induced with rhamnose up to 1% does not  
 192 affect growth.

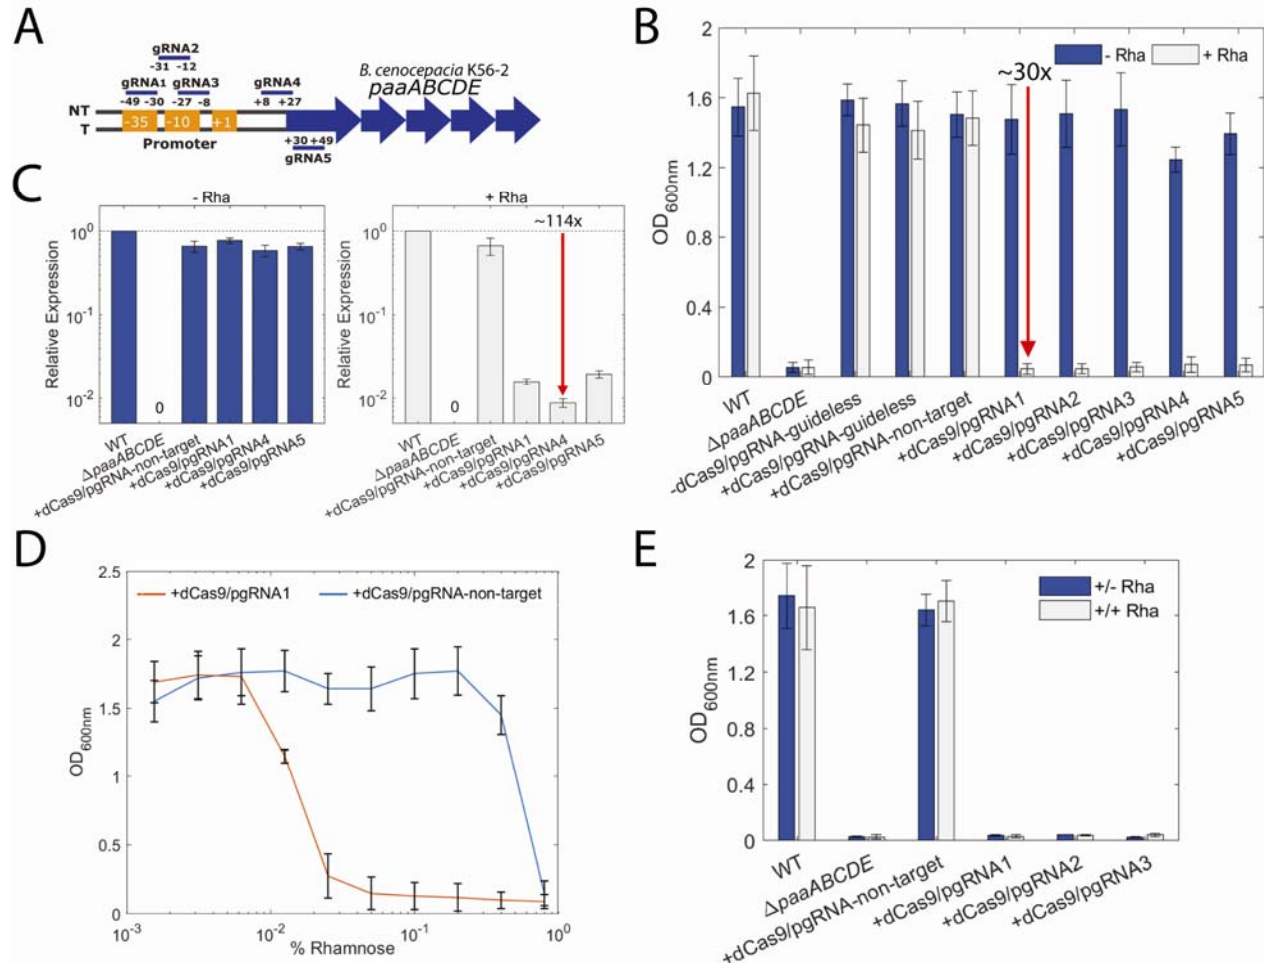

193

194 **Figure 2. Targeting *paaA* with CRISPRi effectively suppresses growth in phenylacetic acid**

195 **as the sole carbon source in *B. cenocepacia* K56-2.** A) Positions of the sgRNAs targeting

196 different regions upstream of and on *paaA*. sgRNAs 1, 2, and 3 were designed to target the

197 promoter elements (-35 and -10 boxes) on the non-template (NT) strand. gRNA4 targeted the

198 start codon on the NT strand and gRNA5 targeted the downstream region adjacent to the start

199 codon on the T strand. B) CRISPRi blocks transcription in a strand non-specific manner. WT, a

200 mutant of the *paaABCDE* operon ( $\Delta$ *paaABCDE*), K56-2::CTX1-rha (-dCas9) and K56-2::dCas9

201 (+dCas9) harboring pgRNA with or without specific gRNAs were grown for 24 hours in minimal

202 medium with PA (M9+PA) without (-Rha) or with 0.2% rhamnose (+Rha). C) RT-qPCR revealed

203 a ~114-fold reduction in *paaA* mRNA, demonstrating a robust knockdown of *paaA* expression in

204 K56-2. D) Expression of the dCas9 can be controlled by varying the amount of inducer added to  
205 the medium, providing tunability to the CRISPRi system. However, high level induction of  
206 dCas9 with rhamnose (0.4% and beyond) was lethal for the non-genome targeting mutant  
207 (dCas9/pgRNA-non-target) expressing dCas9. E) Cells were grown overnight in LB medium  
208 with 0.2% rhamnose to induce expression of dCas9. Then cells were transferred to fresh medium  
209 and grown with (++) Rha and without (+/- Rha) 0.2% rhamnose. All the values are the average  
210 of three independent biological replicates; error bars represent arithmetic mean  $\pm$  SD.

211

212

213 *Single-cell analysis reveals an ‘all or none’ effect in B. cenocepacia K56-2*

214           While at the culture level the effect of CRISPRi is tunable, we further explored the effect  
215 of maximum dCas9 induction at the single-cell level. We therefore targeted *fliF*, a gene encoding  
216 a transmembrane protein that forms both the S and M rings (MS ring) of the basal body complex  
217 of the flagellum (Francis et al., 1992). Silencing *fliF* should result in non-flagellated cells as FliF  
218 is required for flagellum formation (Yang et al., 2017). We targeted *fliF* by introducing four  
219 sgRNAs designed to bind near the putative promoter and start codon on the NT strand  
220 (Supplemental Figure 5A). Our goal was to assess individual cell flagellation and compare it  
221 with swimming motility at the population level. While we observed effective inhibition of  
222 swimming motility compared to controls in a plate-based assay (approximately 5-fold reduction)  
223 (Supplemental Figure 5B and C), we were unable to observe flagella in any of the mutants  
224 harbouring gRNAs targeting *fliF* (Supplemental Figure 5D). It is possible that interfering with  
225 *fliF* expression rendered fragile flagella that could not remain attached to the cell during the  
226 staining process, while still being functional when grown in culture (Komatsu et al., 2016). In  
227 contrast to the swimming motility of the CRISPRi mutants we confirmed that insertional  
228 inactivation of *fliF* (*fliF*::pAH26) completely ablates swimming motility, as seen previously  
229 (Tomich et al., 2002).

230           To further elucidate the effect of CRISPRi at the single cell level, we targeted *phbC*, a  
231 gene encoding poly- $\beta$ -hydroxybutyrate polymerase, an enzyme required for PHB synthesis. To  
232 repress *phbC* expression, we designed three sgRNAs to target the region up to 50 bp before the  
233 start codon on the NT strand, at the putative promoter site (Figure 3A). Polyhydroxyalkanoate  
234 (PHA) granule accumulation was assessed by fluorescence microscopy with Nile Red staining  
235 after overnight induction with rhamnose. For comparison to a null phenotype, we created a *phbC*

236 insertional mutant (*phbC*::pAH27) which was unable to produce PHA granules (Figure 3B and  
237 D). Compared to the wild-type and non-target controls, markedly few cells harbouring sgRNAs  
238 targeting *phbC* contained PHA granules, ranging from 17-70% depending on the sgRNA (Figure  
239 3B). sgRNA6 rendered the strongest level of repression, with only 17.1% of cells containing  
240 PHA granules in contrast to 86.9% for the wild-type (Figure 3B). Interestingly, although few  
241 cells possessed PHA granules, the granules were of identical size to those in wild-type cells,  
242 averaging 0.65 $\mu$ m in diameter (Figure 3C and D). As shown by the insertional mutant,  
243 inactivation of *phbC* ablates PHA granule accumulation; therefore, the presence of granules of  
244 the same size in the dCas9 mutants as in the wild-type is indicative of an ‘all-or-none’ effect in  
245 *B. cenocepacia* K56-2, where most cells display the silenced phenotype, but some manage to  
246 escape the effect of CRISPRi.

247

#### 248 *Broad host range of the mini-CTX system extends applicability to other species*

249 Having shown that the *S. pyogenes* dCas9 renders strong gene repression in *B.*  
250 *cenocepacia* K56-2, we next turned our attention to other important species of *Burkholderia*. We  
251 introduced the codon-optimized *dcas9* gene into the chromosome of *B. multivorans* ATCC  
252 17616 and targeted the *paaA* and *phbC* genes by designing three sgRNAs for each centered  
253 around the putative promoter (Figures 4A and C). Targeted repression of *paaA* by each of the  
254 three sgRNAs strongly suppressed growth in M9+PA by approximately 25-fold (Figure 4B),  
255 very similar to the activity observed in *B. cenocepacia* K56-2. However, we were unable to  
256 detect robust expression of dCas9 by immunoblot in *B. multivorans* ATCC17616 (Supplemental  
257 Figure 6A). Given that the observed phenotype is indicative of effective gene silencing, it is  
258 unlikely that the actual expression of dCas9 in *B. multivorans* ATCC17616 is as low as detected

259 by immunoblot; however, the basis for this discrepancy is unknown. Expression of dCas9 in the  
 260 presence of the non-targeting sgRNA did not affect growth in *B. multivorans* ATCC 17616  
 261 (Supplemental Figure 6B). Following this, targeting

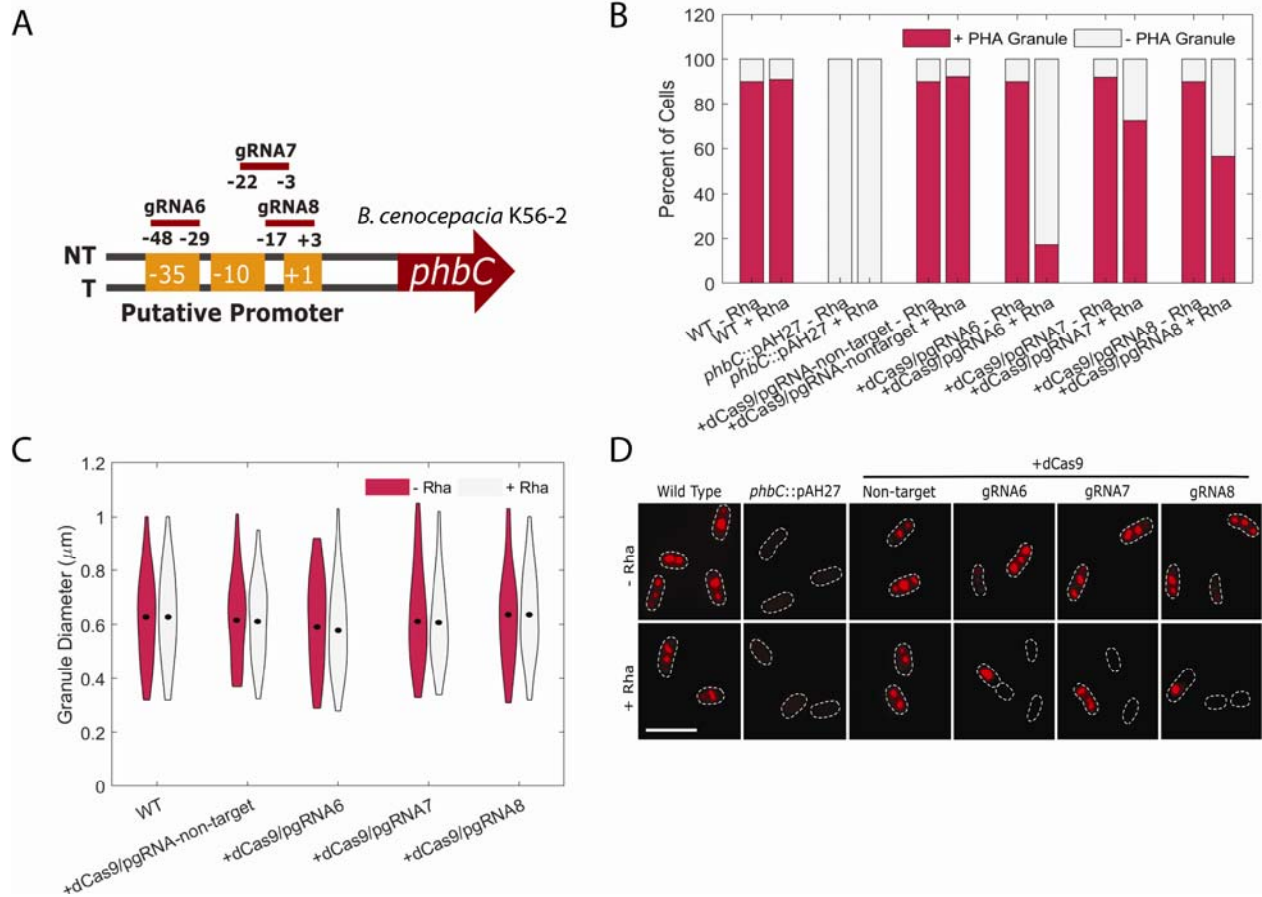

262

263 **Figure 3. Targeting *phbC* with CRISPRi reduces polyhydroxyalkanoate (PHA) granule**  
 264 **accumulation in K56-2.** A) Positions of the sgRNAs targeting different regions upstream of  
 265 *phbC*. sgRNAs 6, 7, and 8 were designed to target the promoter elements (-35 and -10 boxes) on  
 266 the non-template (NT) strand. B) CRISPRi reduces but does not completely abrogate the number  
 267 of cells with PHA granules. WT, an insertional mutant of the *phbC* gene (*phbC*::pAH27), K56-  
 268 2::CTX1-rha (-dCas9) and K56-2::dCas9 (+dCas9) harboring pgRNA with or without specific  
 269 gRNAs were grown overnight without (-Rha) or with 0.2% rhamnose (+Rha). Cells were washed

270 and stained with Nile Red, and observed by fluorescence microscopy. One to two-hundred cells  
271 were counted and the % of cells with PHA granules was calculated. C) PHA granules that remain  
272 are identical to those in the WT. Strains were grown and processed as for B and the diameter of  
273 the PHA granules was measured. Thicker areas of the violin bars represent more granules with  
274 that diameter. The mean in each condition is shown by a black dot. D) The strains were grown  
275 and processed as for B). Dashes indicate cell boundaries and the scale bar is 5  $\mu\text{m}$ .

276



277 *phbC* rendered relatively poor inhibition of PHA granule accumulation with between 35-50% of  
278 cells containing PHA granules, depending on the sgRNA (Figure 4C and D). In contrast to what  
279 was seen in *B. cenocepacia* K56-2, we observed granules of reduced size (Figure 4E and F).

280 Members of the *B. pseudomallei* group are phylogenetically distinct from the Bcc (Eberl  
281 and Vandamme, 2016), but remain of interest due to the ability to cause infection (such as  
282 melioidosis and glanders) and for their remarkable capacity for secondary metabolite production  
283 (Mao et al., 2017). *B. thailandensis* is a commonly used model for the pathogenic members of  
284 the *B. pseudomallei* group, we therefore also introduced the codon-optimized *dcas9* gene into the  
285 chromosome of *B. thailandensis* strain E264. When induced with rhamnose, dCas9 was highly  
286 expressed (Supplemental Figure 6A) and did not impair growth in the presence of a non-  
287 targeting sgRNA (Supplemental Figure 6B). Similarly, as for *B. cenocepacia* K56-2 and *B.*  
288 *multivorans* ATCC 17616, we designed three sgRNAs targeting the putative promoters of the  
289 *paaA* and *phbC* genes (Figure 5A and C). Upon induction of dCas9 with 0.2% rhamnose, growth  
290 of the mutants harbouring the *paaA*-targeting sgRNAs was suppressed in M9+PA to varying  
291 levels ranging from 3-fold (sgRNA19) to 25-fold (sgRNA20) (Figure 5B). Lastly, for the  
292 sgRNAs targeting *phbC*, the results mirror those seen in ATCC 17616, as depending on the  
293 sgRNA there was variation in the percent of cells with PHA granules (10-40%) and the diameter  
294 of the granules (overall decrease in size) (Figure 5C- F). Though the exact contributions to PHA  
295 synthesis in E264 remain unclear, it has been previously suggested that PhbC is not the only  
296 polyhydroxyalkanoate polymerase in E264 (Funston et al., 2017).

297

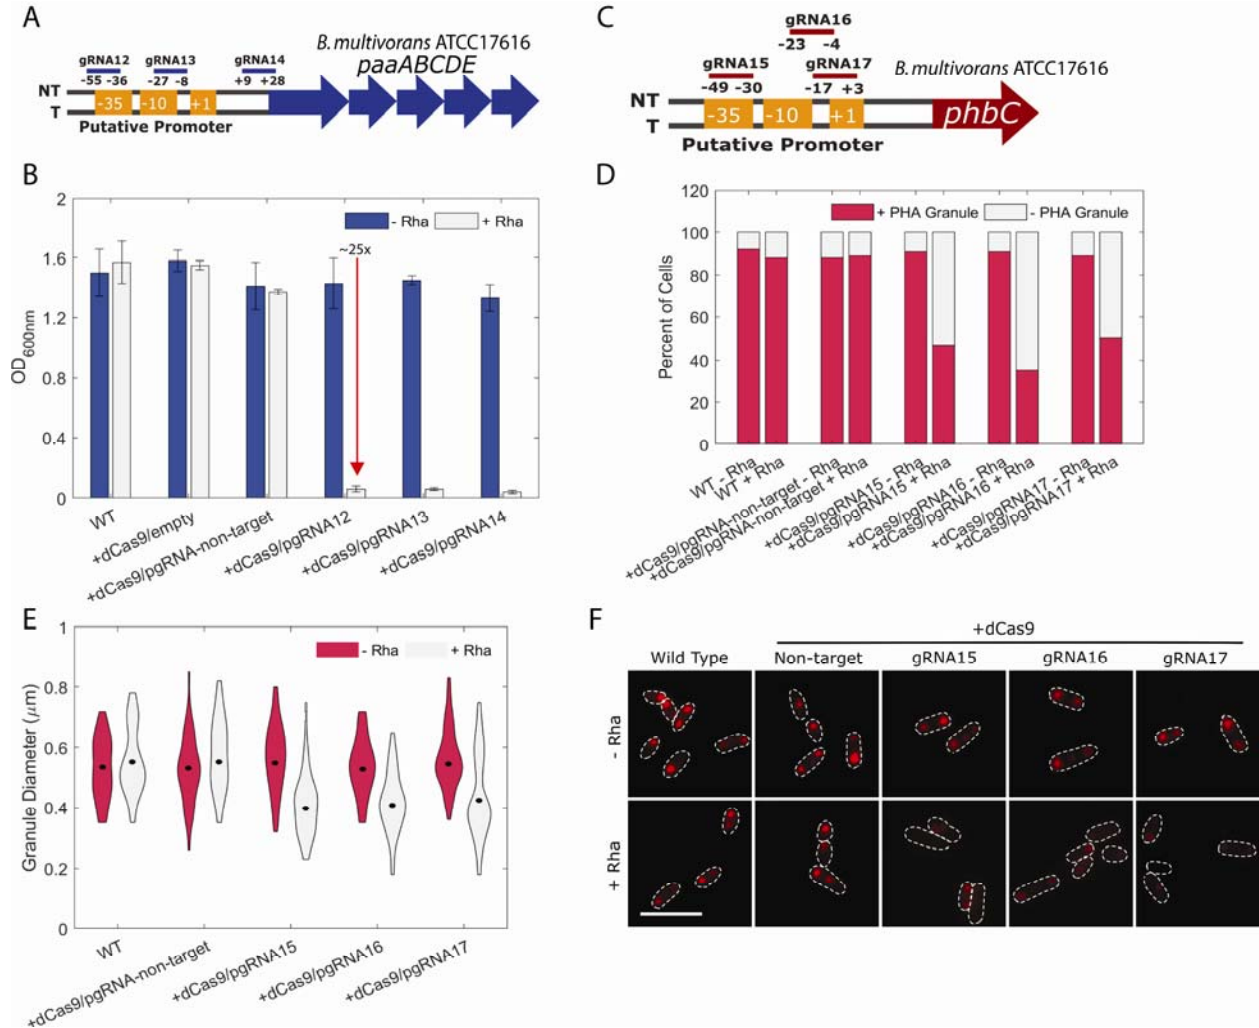

298

299 **Figure 4. CRISPRi in *B. multivorans* ATCC17616 effectively represses *paaA* and *phbC*.** A)

300 Positions of the sgRNAs targeting upstream regions of *paaA*. sgRNAs12 and 13 were designed

301 to target the -35 and -10 boxes of the promoter, while sgRNA14 targeted the 5' region of the

302 ORF. All sgRNAs targeted the NT strand. B) Targeting *paaA* suppressed growth on PA as a sole

303 carbon source. WT, ATCC 17616::dCas9 (+dCas9) with or without sgRNAs in A) were grown

304 for 24 hours in M9+PA without (-Rha) or with 0.2% rhamnose (+Rha). C) Positions of the

305 sgRNAs targeting upstream regions of *phbC*. All sgRNAs were designed to target the -35 or -10

306 elements of the promoter on the NT strand. D) Targeting *phbC* reduces the overall number of

307 cells with PHA granules. Strains were grown overnight without (-Rha) or with 0.2% rhamnose

308 (+Rha). Cells were washed and stained with Nile Red, and observed by fluorescence microscopy.  
309 One to two-hundred cells were counted and the % of cells with PHA granules was calculated. E)  
310 PHA granules that remain are smaller than those in the WT. Strains were grown and processed as  
311 for D); however, the diameter of the PHA granules was measured, with thicker areas  
312 representing more granules with that diameter. The mean in each condition is shown by a black  
313 dot. F) The strains were grown and processed as for D). Dashes indicate cell boundaries and the  
314 scale bar is 5  $\mu\text{m}$ .

315

316

317

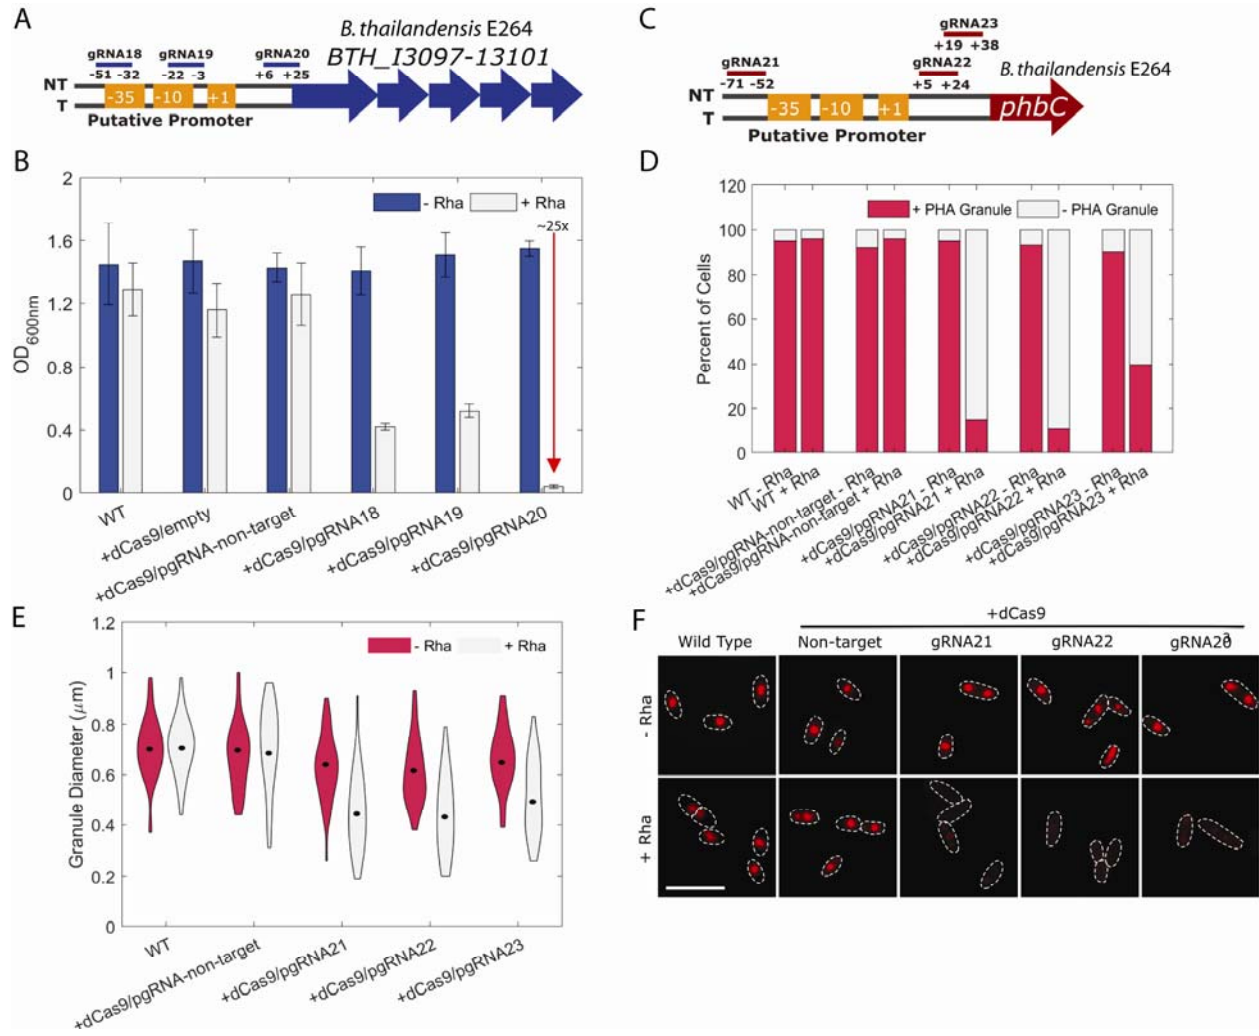

318

319 **Figure 5. CRISPRi in *B. thailandensis* E264 effectively represses *paaA* (BTH\_I3097) and**

320 ***phbC*.** Positions of the sgRNAs targeting upstream regions of *paaA* (BTH\_I3097). sgRNAs 18

321 and 19 were designed to target the -35 and -10 boxes of the promoter, while sgRNA 20 targeted

322 the 5' region of the ORF. All sgRNAs targeted the NT strand. B) Targeting *paaA* suppressed

323 growth on PA as a sole carbon source. WT, E264::dCas9 (+dCas9) with or without sgRNAs in

324 A) were grown for 48 hours in M9+PA without (-Rha) or with 0.2% rhamnose (+Rha). C)

325 Positions of the sgRNAs targeting regions of *phbC*. sgRNA 21 targeted just upstream of the -35

326 box, sgRNA22 and 23 targeted just downstream of the -10 box, all on the NT strand. D)  
327 Targeting *phbC* reduces the overall number of cells with PHA granules. Strains were grown  
328 overnight without (-Rha) or with 0.2% rhamnose (+Rha). Cells were washed and stained with  
329 Nile red, and observed by fluorescence microscopy. One to two-hundred cells were counted and  
330 the % of cells with PHA granules was calculated. E) PHA granules that remain are smaller than  
331 those in the WT. Strains were grown and processed as for D); however, the diameter of the PHA  
332 granules was measured, with thicker areas representing more granules with that diameter. The  
333 mean in each condition is shown by a black dot. F) The strains were grown and processed as for  
334 D). Dashes indicate cell boundaries and the scale bar is 5  $\mu\text{m}$ .  
335

336           The integration vector we implemented to deliver *dcas9* to the chromosome of various  
337 species of *Burkholderia* relies on the expression of the  $\phi$ CTX integrase and recombination using  
338 the plasmid-borne *attP* site with the chromosomal *attB* site (Hoang et al., 2000).  $\phi$ CTX is a  
339 *Pseudomonas*-infecting phage, and the mini-CTX integration system was originally designed for  
340 use in *P. aeruginosa* (Hoang et al., 2000). The mini-CTX integration system has been used  
341 successfully in other species; however, this has been mostly limited to members of *Burkholderia*  
342 (Chapalain et al., 2017; Le Guillouzer et al., 2017). The utility in *Burkholderia* has been  
343 comparable to *P. aeruginosa*, in part owing to efficient integration. In the species used in this  
344 study, we observed the integration efficiencies to be  $6 \times 10^{-7}$  in K56-2,  $6 \times 10^{-8}$  in E264, and  $5 \times 10^{-9}$   
345 in ATCC 17616 (Supplemental Figure 7A), compared to  $10^{-7}$  to  $10^{-8}$  observed previously in *P.*  
346 *aeruginosa* (Hoang et al., 2000). To further broaden the scope of the applicability of our  
347 CRISPRi system, we used NCBI BLAST to search all published genomes for putative *attB* sites.  
348 While the full-length *attB* site is 30 nt, integration is known to occur if only the 5' 19 nt are  
349 completely complementary, such as for many species of *Burkholderia*. This shorter *attB* site was  
350 therefore used as a BLAST query, resulting in 1760 hits with 100% alignment (Supplementary  
351 Table 5). Enterobacteria were excluded from the search as the pMB1 *oriR* in the mini-CTX  
352 system is functional in these species; therefore, integrants cannot be easily isolated. Furthermore,  
353 the search parameters were modified to only include species of Proteobacteria, as there were few  
354 hits of non-Proteobacterial species with 100% alignment (data not shown). Overall, there were  
355 168 unique species from 67 genera. As expected, the most abundant hit corresponded to species  
356 and strains of *Pseudomonas* (480 hits), then followed by *Acinetobacter* (443 hits), *Burkholderia*  
357 (276 hits), *Neisseria* (170 hits), and *Ralstonia* (146 hits), with members of the other 62 genera  
358 comprising the remaining 245 hits. A summary of the major hits and species of interest

359 (pathogenic, environmental, biotechnological, etc.) can be found along with the genomic context  
360 in Table 1. We note that the hit table comprises species with both high and low GC-content  
361 genomes, and while the GC-rich codon-optimized *dcas9* (in pAH-CTX1-rhadCas9) may be  
362 better suited for species with high GC-content genomes, such as those in the families  
363 *Pseudomonadaceae* and *Alcaligenaceae*, the native *dcas9* (in pAH-CTX1-rhadCas9-native) may  
364 have better functionality in species with low GC-content genomes, such as those in the families  
365 *Moraxellaceae* and *Neisseriaceae*.

366 A further consideration for use of our CRISPRi system is that the pFLPe recombinase-  
367 expressing plasmids might not be functional in all species. In which case, the *int* and *tet* genes  
368 along with the *oriT* and pBM1 *oriR* would not be excised and the mutant would remain resistant  
369 to tetracycline. To explore if experiments could be performed in the absence of tetracycline  
370 selection, we assessed the stability of the mini-CTX integration in K56-2, ATCC 17616, and  
371 E264 in serial passages over four days without tetracycline. For all species over the entire  
372 experiment we determined CFU counts on agar with and without tetracycline selection and found  
373 equal recovery of tetracycline-resistant colonies as total colonies (Supplemental Figure 7B-D),  
374 suggesting the integration is stable.

375 **Table 1.** Putative host range of the mini-CTX system and genomic context of selected hit sites

| Class               | Order            | Family                     | Genus and Species                 | Strain                               | %GC                                                   | tRNA <sup>Ser</sup> ( ) Genomic Context                                                     |                                                 |
|---------------------|------------------|----------------------------|-----------------------------------|--------------------------------------|-------------------------------------------------------|---------------------------------------------------------------------------------------------|-------------------------------------------------|
| Gammaproteobacteria | Pseudomonadales  | Pseudomonadaceae           | <i>Pseudomonas aeruginosa</i>     | PAO1                                 | 66.6                                                  | PA2603 → PA2603.1 → PA2604 →                                                                |                                                 |
|                     |                  |                            | <i>Pseudomonas fluorescens</i>    | NCTC 10783                           | 65.9                                                  | EL286_RS07728 → EL286_RS07730 → EL286_RS07735 →                                             |                                                 |
|                     |                  |                            | <i>Pseudomonas mendocina</i>      | NK-01                                | 64.7                                                  | MDS_RS12090 → MDS_RS12065 → MDS_RS12070 →                                                   |                                                 |
|                     |                  | Moraxellaceae              | <i>Acinetobacter baumannii</i>    | ATCC 17978                           | 39                                                    | AUO97_RS02215 → AUO97_RS02215 → AUO97_RS02220 → // → fedH → AUO97_RS12570 → AUO97_RS12570 → |                                                 |
|                     |                  |                            | <i>Acinetobacter nosocomialis</i> | NCTC 8102                            | 38.7                                                  | DIW83_RS04465 → DIW83_RS04470 → DIW83_RS04475 → // → DIW83_RS13465 → DIW83_RS13470 → fedH → |                                                 |
| Xanthomonadales     | Xanthomonadaceae | <i>Xylella fastidiosa</i>  | M12                               | 51.9                                 | XFASM12_RS11770 → XFASM12_RS07835 → XFASM12_RS07840 → |                                                                                             |                                                 |
| Betaproteobacteria  | Burkholderiales  | Alcaligenaceae             | <i>Achromobacter xylosoxidans</i> | NCTC 10808                           | 67.4                                                  | DQO23_RS06440 → DQO23_RS06445 → DQO23_RS06450 →                                             |                                                 |
|                     |                  |                            | <i>Bordatella bronchiseptica</i>  | D448                                 | 68.1                                                  | CS344_RS23895 → CS344_RS23900 → CS344_RS23905 →                                             |                                                 |
|                     |                  |                            | <i>Alcaligenes faecalis</i>       | DSM 30030                            | 56.6                                                  | CPY64_RS11990 → CPY64_RS11995 → CPY64_RS12000 →                                             |                                                 |
|                     |                  |                            | Burkholderiaceae                  | <i>Ralstonia pickettii</i>           | DTP0602                                               | 65.9                                                                                        | N234_04430 → N234_04435 → N234_04440 →          |
|                     |                  |                            |                                   | <i>Burkholderia cenocepacia</i>      | K56-2                                                 | 67                                                                                          | WQ49_RS02320 → WQ49_RS02325 → WQ49_RS02330 →    |
|                     |                  |                            |                                   | <i>Burkholderia multivorans</i>      | ATCC 17616                                            | 66.7                                                                                        | BMULJ_RS32145 → BMULJ_RS04145 → BMULJ_RS04145 → |
|                     |                  |                            |                                   | <i>Burkholderia thailandensis</i>    | E264                                                  | 67.7                                                                                        | BTH_RS32930 → BTH_RS20275 → BTH_RS20280 →       |
|                     |                  |                            | <i>Burkholderia mallei</i>        | NCTC 10229                           | 68.5                                                  | BMA10229_RS30760 → BMA10229_RS21985 → BMA10229_RS21990 →                                    |                                                 |
|                     |                  |                            | <i>Burkholderia pseudomallei</i>  | NCTC 13178                           | 67.9                                                  | BBJ_RS32360 → BBJ_RS01310 → BBJ_RS01315 →                                                   |                                                 |
|                     |                  |                            | <i>Burkholderia oklahomensis</i>  | EO147                                | 66.9                                                  | DM82_RS11255 → DM82_RS11260 → DM82_RS11265 →                                                |                                                 |
|                     |                  | <i>Cupriavidus necator</i> | NH9                               | 65.5                                 | BJN34_RS05080 → BJN34_RS05085 → BJN34_RS05090 →       |                                                                                             |                                                 |
|                     |                  | <i>Pandoraea apista</i>    | AU2161                            | 62.6                                 | AA956_RS16715 → AA956_RS16720 → AA956_RS25505 →       |                                                                                             |                                                 |
|                     |                  | <i>Lautropia mirabilis</i> | NCTC 12852                        | 65.5                                 | EL249_RS10810 → EL249_RS10815 → EL249_RS10820 →       |                                                                                             |                                                 |
|                     |                  | Oxalobacteriaceae          | <i>Collimonas fungivorans</i>     | Ter6                                 | 59                                                    | CFter6_RS10510 → CFter6_RS10515 → CFter6_RS25055 →                                          |                                                 |
|                     |                  |                            | Commamonadaceae                   | <i>Rhodiferax antarcticus</i>        | DSM 24876                                             | 58.9                                                                                        | RA876_RS18910 → RA876_RS18915 → RA876_RS18920 → |
|                     |                  |                            |                                   | <i>Polaromonas naphthalenivorans</i> | CJ2                                                   | 61.7                                                                                        | PNAP_RS04840 → PNAP_RS04845 → ureG →            |
|                     |                  | Neisseriales               | Neisseriaceae                     | <i>Neisseria meningitidis</i>        | NCTC 10026                                            | 51.4                                                                                        | EL323_RS06235 → EL323_RS06240 → yaaA →          |
|                     |                  |                            |                                   | <i>Neisseria gonorrhoeae</i>         | NCTC 13484                                            | 52.5                                                                                        | EL177_RS06240 → EL177_RS06245 → yaaA →          |
|                     |                  |                            |                                   | <i>Neisseria sicca</i>               | FDAARGOS_260                                          | 50.9                                                                                        | AGJ88_RS26510 → AGJ88_RS26515 → AGJ88_RS26520 → |
|                     |                  |                            |                                   | <i>Chromobacterium violaceum</i>     | CV1197                                                | 65.6                                                                                        | CR207_RS10565 → CR207_RS10570 → CR207_RS10575 → |
|                     |                  | Nitrosomonadales           | Nitrosomonadaceae                 | <i>Nitrosomonas communis</i>         | Nm2                                                   | 44.7                                                                                        | AAW31_RS16120 → AAW31_RS16125 → AAW31_RS16130 → |
|                     |                  | Hydrogenophilalia          | Hydrogenophilales                 | Hydrogenophilaceae                   | <i>Hydrogenophilus thermoluteolus</i>                 | TH-1                                                                                        | 61.7                                            |
| Alphaproteobacteria | Rhodospirillales | Rhodospirillaceae          | <i>Haematospirillum jordaniae</i> | H5569                                | 55.6                                                  | AY555_RS08435 → AY555_RS08440 → AY555_RS08445 →                                             |                                                 |

376



## 377 **Discussion**

378 Genetic tools are necessary to dissect the molecular mechanisms governing cellular  
379 processes. Here, we report the development of a CRISPRi system for efficient repression of gene  
380 expression in *Burkholderia*. By mobilizing the *dcas9* gene that was codon-optimized for the GC-  
381 rich *Burkholderia* on a broad host range mini-CTX1 integration vector, we demonstrate robust,  
382 tunable, and durable repression of endogenous genes. While others have shown effective  
383 repression using the native *dcas9* gene in *E. coli* (Qi et al., 2013), *B. subtilis* (Peters et al., 2016),  
384 *Staphylococcus aureus*, and *Acinetobacter baumannii* (Peters et al., 2019), codon-optimization  
385 was a necessary step for K56-2, as expression of the native *dcas9* gene was not detectable in  
386 K56-2. Indeed, for expression in species with high GC-content, codon optimization appears to be  
387 necessary. In *P. aeruginosa* (66.3% GC) both the *S. pyogenes* dCas9 (Peters et al., 2019) and the  
388 *S. pasteurianus* dCas9 (Tan et al., 2018) were not expressed unless first codon-optimized, albeit  
389 for *Mycobacterium* (~67% GC) or *Homo sapiens* (optimized at 50.2% GC). Additionally, the *S.*  
390 *thermophilus* dCas9 was codon-optimized for *Mycobacterium* for efficient expression in *M.*  
391 *tuberculosis* and *M. smegmatis* (Rock et al., 2017).

392 Upon codon-optimizing the *dcas9* gene, we observed a severe growth defect when  
393 expressed from a multicopy pBBR1 origin plasmid. At this time, we are unsure if this was  
394 caused by a metabolic burden of expressing a large protein from a multicopy plasmid or from  
395 direct proteotoxicity. Previous studies have demonstrated that expression of the canonical *S.*  
396 *pyogenes* dCas9 causes toxicity in *M. smegmatis*, *M. tuberculosis* (Rock et al., 2017), and *E. coli*  
397 (Cho et al., 2018), which provides rationale for developing a system with low-enough levels of  
398 dCas9 expression to maintain cell viability without sacrificing repression activity. While this  
399 effort has spurred the exploration of alternative dCas9 orthologues (Rock et al., 2017), we found

400 that introducing *dcas9* in single copy in the chromosome provided a balance of repression  
401 activity without affecting growth. Furthermore, while other systems display up to 3-fold  
402 repression in the absence of inducer (Peters et al., 2016; Tan et al., 2018), our application of the  
403 tightly regulated rhamnose-inducible promoter from *E. coli* does not display such a phenomenon  
404 in any of the three species tested. However, with the benefit of apparently negligible uninduced  
405 expression, the rhamnose-inducible promoter is incapable of attaining the high levels of maximal  
406 expression seen in other systems, such as the xylose-inducible promoter used in the *B. subtilis*  
407 CRISPRi library (Peters et al., 2016) (Supplementary Figure 4A). While we did observe  
408 increased dCas9 expression at rhamnose concentrations of 0.5% and 1.0% with no inhibitory  
409 effect on growth in LB (Figure 1C and D), the increased level of dCas9 expression was  
410 accompanied by a substantial growth defect in M9 minimal media with PA (Figure 2D) or  
411 glycerol (data not shown) as the sole carbon source. As the growth rate is decreased in minimal  
412 media, it is possible that growth inhibitory, off-target effects that are alleviated in fast growing  
413 cells by dilution of dCas9 bound DNA sites with newly replicated ones, are more evident in  
414 slowly growing cells. While the RNA polymerase is largely incapable of displacing the  
415 dCas9:sgRNA complex, the DNA replication machinery is not blocked by dCas9. In fact, it has  
416 been observed that the dissociation of the dCas9:sgRNA complex correlates well with the  
417 generation time in *E. coli* (Jones et al., 2017). This is an important consideration for  
418 understanding the durability of growth suppression we observed when using PA as a sole carbon  
419 source. Cells primed by pre-incubation with rhamnose are unable to grow in M9+PA, creating a  
420 condition where *paaA* is an essential gene and its absence would arrest cell division and  
421 replication. Hence, the DNA replication machinery would not displace the dCas9:sgRNA from  
422 the *paaA* gene, resulting in long-term growth suppression. By extension, we predict that strong

423 knockdown of any (conditionally) essential gene that causes a halt in DNA replication would be  
424 durable in this manner. This is a useful aspect of CRISPRi that we are investigating further.

425         Although it has been reported that the CRISPRi system is less effective in silencing gene  
426 expression when the template strand (T) is targeted compared to the non-template (NT) strand,  
427 our results demonstrated nearly 30-fold repression of the growth irrespective of the *paaA* target  
428 strand (Figure 2B). This suggests that the efficiency of the CRISPRi system might not be strand  
429 specific at all loci, supporting the findings from Howe et al. (Howe et al., 2017). However, this  
430 effect might have been masked by the strong repression we observed, as it is difficult to compare  
431 across null phenotypes. This is supported by the RT-qPCR that demonstrated differential  
432 repression of gene expression based on the targeted location. Interestingly, our data suggests that,  
433 for *paaA*, targeting near the start codon of the NT strand (gRNA4) was more effective than  
434 targeting near the start codon of the T strand (gRNA5). Additionally, sgRNAs targeting different  
435 regions of the 5' region of *paaA* produced a strong 25 to 30-fold repression in the three species  
436 studied here. Therefore, the observed knockdown efficiency appears to be largely unaffected by  
437 sgRNA placement on targeting regions overlapping or adjacent to the -35 and -10 promoter  
438 elements, at least for phenotypes where complete suppression of gene expression is not required.  
439 The cause of this is likely due to the large dCas9:sgRNA complex that when bound to the  
440 promoter sterically interferes with RNA polymerase binding. Indeed, the ~160 kDa dCas9  
441 enzyme has an average DNA footprint of 78.1 bp, much larger than most promoter regions  
442 (Josephs et al., 2015).

443         Single cell level analysis of our system demonstrated a unimodal 'all or none' effect in  
444 K56-2 with ~17% cells escaping the silenced phenotype when targeting *phbC* compared to an  
445 insertion mutant, which did not possess any granules. The PHB granules in these cells were of

446 identical diameter to wild type, averaging 0.65 $\mu$ m in diameter. The ‘all or none’ effect might be  
447 attributed to an uneven distribution of the membrane transporter involved in transporting  
448 rhamnose into the cell, essentially escaping the rhamnose mediated *dCas9* induction to silence  
449 the target gene (Siegele and Hu, 1997). Interestingly, targeting *phbC* in *B. multivorans*  
450 ATCC17616 and *B. thailandensis* E264 resulted in a mixed phenotype with a reduced number of  
451 cells with granules as well as an overall decrease in granule size. Even though some of the cells  
452 seemed to have escaped the repression (up to 35% in ATCC17616 and 6% in E264), more than  
453 90% of the cells contained granules of reduced size. This suggests that there is an unelucidated  
454 secondary PHA synthesis pathway in *B. thailandensis* E264 and *B. multivorans* ATCC17616.  
455 Funston et al. (Funston et al., 2017) have observed similar results in *B. thailandensis* E264 where  
456 transposon mutants in *phb* genes (*phbA*, *phbB* and *phbC*) retained the ability to synthesize PHA,  
457 albeit at lower levels.

458 One of the hallmarks of CRISPRi is the broad-range amenability in diverse bacteria,  
459 enabling synthetic biology and mechanistic investigations into many dozens of species in  
460 innovative ways. We wished to apply our CRISPRi system in this manner and therefore  
461 mobilized both the native *dcas9* gene, suitable for low/medium GC-content organisms, and the  
462 *dcas9* gene, codon-optimized for GC-rich *Burkholderia*, on the mini-CTX1 integration vector.  
463 Our analysis of putative hosts (with *attB* sites near the 3’ end of the serine tRNA) identified 168  
464 unique species in 67 genera, mostly from the  $\beta$ - and  $\gamma$ -Proteobacteria. Previous works have  
465 mobilized *dcas9* on broad host-range integrative plasmids (Peters et al., 2019; Tan et al., 2018);  
466 however, both systems use the mini-Tn7 system, which has multiple insertion locations in certain  
467 genomes, such as many species of *Burkholderia*. Together, our work contributes to the available  
468 genetic toolkit for rapid functional analysis of bacteria.

469

470

## 471 **Methods**

### 472 *Strains, selective antibiotics, and growth conditions*

473 All strains and plasmids are found in Supplemental Table 1. All strains were grown in  
474 LB-Lennox medium (Difco). *B. cenocepacia* K56-2 and strains of *E. coli* were grown at 37°C,  
475 while *B. thailandensis* E264 and *B. multivorans* ATCC 17616 were grown at 30°C. The  
476 following selective antibiotics were used: chloramphenicol (Sigma; 100 µg/mL for *B.*  
477 *cenocepacia*, 20 µg/mL for *E. coli*), trimethoprim (Sigma; 100 µg/mL for strains of  
478 *Burkholderia*, 50 µg/mL for *E. coli*), tetracycline (Sigma; 50 µg/mL for all strains of  
479 *Burkholderia*, 20 µg/mL for *E. coli*), kanamycin (Fisher Scientific; 250 µg/mL for *B.*  
480 *thailandensis*, 150 µg/mL for *B. multivorans*, 40 µg/mL for *E. coli*), ampicillin (Sigma; 100  
481 µg/mL for *E. coli*), gentamicin (Sigma; 50 µg/mL for all strains of *Burkholderia*).

### 482 *Construction of pSC-rhadCas9, pAH-CTX1-rhadCas9, pAH-CTX1-rhadCas9-native, and dCas9* 483 *insertional mutants*

484 The endogenous *cas9* gene from *S. pyogenes* has low GC content (averaging 34.1%) and  
485 subsequently poor codon usage for GC-rich organisms (<http://www.kazusa.or.jp/codon/>). The  
486 nuclease-inactive variant (*dcas9*) was therefore codon optimized for *B. cenocepacia* by  
487 purchasing the optimized gene in two fragments from IDT (2462 bp and 1849 bp, Supplemental  
488 Table 2), each with 38 bp overlapping regions. Strong, rho-independent terminators were added  
489 following the gene. The full-length gene (with terminal *NdeI* and *HindIII* cut sites) was  
490 synthesized by overlap-extension PCR using Q5 polymerase with high GC buffer (NEB) and

491 primers 979 and 987 (Supplemental Table 2). The first ten rounds of PCR were performed  
492 without primers to synthesize the full-length product using the overlap regions; primers were  
493 added for the following 25 cycles. The cycle parameters are as follows: 98°C for 30 sec, (98°C  
494 for 10 sec, 67.5°C for 20 sec, 72°C for 2.5 min)x10 cycles, 72°C for 5 min, 98°C for 30 sec,  
495 (98°C for 10 sec, 62.5°C for 20 sec, 72 °C for 2.5 min)x25 cycles, 72°C for 10 min. The 4267 bp  
496 product was gel-purified (Qiagen) and introduced into pSCrhaB2 by restriction cloning using  
497 *NdeI* and *HindIII* (NEB). The resulting plasmid, pSC-rhadCas9, was transformed into *E. coli*  
498 DH5 $\alpha$ , and trimethoprim-resistant colonies were screened by colony PCR with primers 954 and  
499 955. Triparental mating with *E. coli* MM290/pRK2013 as a helper was performed as previously  
500 described (Hogan et al., 2018).

501 To introduce the optimized *dcas9* into the mini-CTX1 insertion plasmid (Hoang et al.,  
502 2000) serial restriction cloning was used (Supplemental Figure 3A). Briefly, the rhamnose-  
503 inducible promoter from pSC201 (Ortega et al., 2007) was first PCR amplified with Q5  
504 polymerase and primers 976 and 1071, containing *HindIII* and *SpeI* restriction sites, respectively.  
505 This fragment was introduced into mini-CTX1, to create pAH-CTX1-rha, and tetracycline-  
506 resistant *E. coli* DH5 $\alpha$  were screened by colony PCR using primers 957 and 1074. The fragment  
507 containing the dCas9 gene was PCR amplified as above, but instead using primers 1072 and  
508 1073, introducing *SpeI* and *NotI* restriction sites, respectively. This fragment was introduced into  
509 pAH-CTX1-rha, to create pAH-CTX1-rhadCas9, and tetracycline-resistant *E. coli* DH5 $\alpha$   
510 colonies were screened by colony PCR using primers 954 and 955.

511 The native (non codon-optimized) *dcas9* was also introduced into pAH-CTX1-rha. The  
512 native *dcas9* and transcriptional terminators were PCR amplified from pdCas9-bacteria  
513 (Addgene plasmid # 44249) with Q5 polymerase (NEB) using primers 1216 and 1217. The PCR

514 product was cloned into pAH-CTX1-rha (creating pAH-CTX1-rhadcas9-native) using *NotI* and  
515 *SpeI* restriction sites then transformed into *E. coli* DH5 $\alpha$ . Tetracycline-resistant colonies were  
516 screened by PCR using primers 954 and 1218.

517 pAH-CTX1-rha, pAH-CTX1-rhadCas9, and pAH-CTX1-rhadCas9-native were  
518 introduced into *Burkholderia* species by triparental mating using *E. coli* MM290/pRK2013 as a  
519 helper as above. Tetracycline-resistant colonies were screened by colony PCR using primer 954  
520 (for pAH-CTX1-rha) or 1075 (for pAH-CTX1-rhadCas9) or 1219 (for pAH-CTX1-rhadcas9-  
521 native) and 1008 (for *B. cenocepacia*), 1167 (for *B. multivorans*), or 1168 (for *B. thailandensis*).

522 To remove the tetracycline resistance and integrase genes from the insertional mutants  
523 constructed with pAH-CTX1-rhadCas9 and pAH-CTX1-rha (Supplemental Figure 3), the  
524 Flannagan method (Flannagan et al., 2008) was used for *B. cenocepacia* K56-2, while and the  
525 pFLPe system (Choi et al., 2008) was used for *B. multivorans* ATCC 17616 and *B. thailandensis*  
526 E264. To remove the regions flanking the *FRT* sites in *B. cenocepacia* K56-2, a fragment with  
527 475 bp overlapping the upstream and downstream regions of the *FRT* sites was designed and  
528 synthesized (IDT) with *KpnI* and *EcoRI* restriction sites, respectively. The fragment was ligated  
529 into pGPI-*SceI* (Flannagan et al., 2008) via the *KpnI* and *EcoRI* restriction sites, creating pAH18,  
530 and transformed into *E. coli* SY327. Trimethoprim-resistant colonies were screened for the  
531 insertion of the fragment with primer 153 and 154. pAH18 was introduced into the mutant  
532 backgrounds via triparental mating, as described above. Trimethoprim-resistant K56-2 were  
533 screened by PCR for both possible integration orientations using primers 154 and 1126, or 153  
534 and 1133. To initiate the second recombination, an *SceI*-expressing plasmid is required;  
535 however, the conventional plasmid, pDAI-*SceI*, confers tetracycline resistance and could not be  
536 selected for in the mutant background. Therefore, the tetracycline resistance cassette was

537 removed by digestion with *AgeI* and *XhoI*. The chloramphenicol resistance gene *cat* was PCR  
538 amplified from pKD3 (Datsenko and Wanner, 2000) using primers 1084 and 1150, then ligated  
539 into the *AgeI* and *XhoI*-digested pDAI-*SceI* backbone and transformed into *E. coli* DH5 $\alpha$ ,  
540 creating pAH25-*SceI*. Chloramphenicol-resistant colonies were screened with primers 1091 and  
541 1150. pAH25-*SceI* was introduced into the mutant backgrounds by triparental mating as  
542 described above. Chloramphenicol-resistant colonies were screened for sensitivity to  
543 trimethoprim (indicating excision of pAH18) and tetracycline (indicating excision of the genes  
544 between the *FRT* sites), and then screened by PCR with primers 1126 and 1133, which bridge the  
545 excision.

546 The pFLPe system was used to remove the tetracycline resistance and integrase genes in  
547 the dCas9 mutants in *B. multivorans* ATCC 17616 and *B. thailandensis* E264. Triparental mating  
548 to introduce pFLPe4 into the strains was performed as for K56-2 above, except 0.2% rhamnose  
549 was added to the mating and antibiotic selection plates. Tetracycline-sensitive colonies were  
550 screened by PCR using primers 957 and 1194 (for *B. multivorans*) or 1195 (for *B. thailandensis*).  
551 pFLPe4 has a temperature-sensitive origin of replication; therefore, mutants were grown  
552 overnight in LB without antibiotics at 37°C. Single colonies were then tested for kanamycin  
553 sensitivity and then by colony PCR for pFLPe4 using primers 1128 and 1129.

#### 554 *Design and construction of the sgRNA-expressing plasmids*

555 PAM sequences closest to the 5' end of the transcription start site (TSS) were first  
556 identified on both the non-template and template strands. We extracted 20-23 nucleotides  
557 adjacent to the PAM sequence to design the base-pairing region of the sgRNAs in the following  
558 format: 5'-CCN-N<sub>(20-23)</sub>-3' for targeting the non-template strand and 5'N<sub>(20-23)</sub>-NGG-3' for the  
559 template strand. To score the specificity and identify off-target binding sites, the 5' end of the



560 20-23nt variable base-pairing sequences were trimmed one base at a time and the remaining  
561 base-pairing region was searched against the appropriate organism's reference genome. This was  
562 repeated until only 10 nt was used as a search query. Potential sgRNAs were discarded if off-  
563 target sites were discovered in this manner.

564 The expression vector pSCrhaB2 (Cardona and Valvano, 2005) was chosen as the  
565 method of sgRNA expression due to the broad host range of the pBBR1 origin of replication.  
566 The sgRNA cassette from pgRNA-bacteria (Qi et al., 2013) (Addgene plasmid # 44251) was  
567 introduced into pSCrhaB2 by restriction cloning with *EcoRI* and *HindIII* (NEB) to create  
568 pSCrhaB2-sgRNA. To remove *rhaS* and *rhaR*, inverse PCR was performed using Q5 polymerase  
569 (NEB) and primers 847 and 1025. The resulting fragment was ligated by blunt-end ligation using  
570 1 $\mu$ L of PCR product incubated with 0.5  $\mu$ L *DpnI*, 0.5  $\mu$ L T4 polynucleotide kinase, and 0.5  $\mu$ L  
571 T4 ligase (NEB) with quick ligation buffer (NEB) at 37°C for 30 minutes. The resulting plasmid,  
572 pSCB2-sgRNA, was screened using primers 781 and 848, which span the ligated junction.  
573 Individual sgRNAs were introduced into pSCB2-sgRNA using inverse PCR as previously  
574 described (Qi et al., 2013) (Supplemental Table 3).

#### 575 *Construction of insertional mutants K56-2 fliF::pAH26 and K56-2 phbC::pAH27*

576 Inactivation of *fliF* was performed with the mutagenesis system of Flannagan et al.  
577 (Flannagan et al., 2007). Briefly, a 322 bp internal fragment of *fliF* was PCR amplified from the  
578 K56-2 genome using primers 1156 and 1157 and Q5 polymerase (NEB). The fragment and  
579 pGP $\Omega$ -Tp were double digested with *KpnI* and *EcoRI* (NEB) and ligated with T4 ligase (NEB).  
580 The resulting plasmid, pAH26, was electroporated into *E. coli* SY327, and trimethoprim-  
581 resistant colonies were screened by colony PCR for the *fliF* fragment. Triparental matings were

582 performed as above. Trimethoprim-resistant exconjugants, were screened by motility assay  
583 (below).

584 Inactivation of *phbC* (WQ49\_RS30385) was performed as for *fliF*. Briefly, a 328 bp  
585 internal fragment of *phbC* was PCR amplified from the K56-2 genome using primers 1196 and  
586 1197 and Q5 polymerase (NEB). The plasmid, pAH27, created from ligating the fragment into  
587 pGPΩ-Tp using *KpnI* and *EcoRI* (NEB) restriction sites, was electroporated into *E. coli* SY327  
588 and trimethoprim-resistant colonies were screened by colony PCR for the *phbC* fragment.  
589 Triparental matings were performed as above, and trimethoprim-resistant exconjugants were  
590 screened by staining for polyhydroxyalkanoate granule accumulation (below).

#### 591 *Assays for integration efficiency and stability of the mini-CTXI-based system*

592 To assess integration efficiency, triparental matings were started as above. However, after  
593 the mating on LB agar, the pellicles were serially diluted and plated for CFU/mL on LB agar  
594 with 50 µg/mL gentamicin and LB agar with 50 µg/mL tetracycline and 50 µg/mL gentamicin.

595 To assess stability of the integration, cultures of the dCas9 mutants (containing the  
596 tetracycline resistance cassette) were serially passaged over 4 days without antibiotics. Each day, a  
597 fresh culture was started with a 1:2500 dilution of the previous day's stationary phase culture. In  
598 addition, the cultures were serially diluted and plated for CFU/mL on LB agar without antibiotics  
599 and LB agar with 50 µg/mL tetracycline.

#### 600 *Growth assay with phenylacetic acid as the sole carbon source*

601 Overnight cultures, started from isolated colonies, of the appropriate strains were washed  
602 at 4000x g for 4 minutes and resuspended in PBS (2.7 mM KCl, 136.9 mM NaCl, 1.5 mM  
603 KH<sub>2</sub>PO<sub>4</sub>, 8.9 mM Na<sub>2</sub>HPO<sub>4</sub>, pH 7.4) to remove growth medium. The OD<sub>600nm</sub> of the cultures was

604 normalized to 0.01 in M9 medium supplemented with 5 mM phenylacetic acid, 100 µg/mL  
605 trimethoprim, and 0.2% rhamnose as required. The culture was added to wells of a 96-well plate  
606 and incubated with continuous shaking at 37°C (*B. cenocepacia* K56-2) or 30°C for *B.*  
607 *multivorans* ATCC 17616 and *B. thailandensis* E264). The OD<sub>600nm</sub> of the cultures was measured  
608 after 24 hours for *B. cenocepacia* K56-2 and *B. multivorans* ATCC 17616, or 48 hours for *B.*  
609 *thailandensis* E264.

610

#### 611 *Fluorescent microscopy and polyhydroxyalkanoate granule detection*

612 Overnight cultures of the appropriate strains with or without rhamnose were first washed  
613 to remove growth medium and resuspended in PBS. Cells were fixed in 3.7% formaldehyde +  
614 1% methanol at room temperature for 10 minutes (*B. cenocepacia* K56-2) or 20 minutes (*B.*  
615 *multivorans* ATCC 17616 and *B. thailandensis* E264) then quenched by the addition of an equal  
616 volume of 0.5 M glycine. The cells were washed and resuspended in PBS with 0.5 µg/mL Nile  
617 Red (Carbosynth) and stained at room temperature in the dark for 20 minutes, after which the  
618 cells were washed to remove excess stain and resuspended in PBS. The cells were mounted on  
619 1.5% agarose pads and imaged by fluorescence microscopy at 1000x total magnification on an  
620 upright AxioImager Z1 (Zeiss). Nile Red was excited at 546/12 nm and detected at 607/33 nm.

#### 621 *Plate-based motility assay*

622 Assays were performed as previously described (Kumar and Cardona, 2016), with some  
623 modifications. Briefly, strains were grown on LB agar with the appropriate antibiotics and single  
624 colonies were stab-inoculated into motility medium consisting of nutrient broth (Difco) with

625 0.3% agar. Medium was supplemented with rhamnose (Sigma) as appropriate. Plates were  
626 incubated right-side up for 22 hours at 37°C.

### 627 *Flagellum staining*

628 Staining was performed as previously described (Kumar and Cardona, 2016). Briefly, an  
629 overnight culture was rested statically at room temperature for 20 minutes. Gently, a 1 in 10  
630 dilution was prepared in water and rested statically for a further 20 minutes. A small drop of the  
631 diluted culture was placed on a clean glass slide and rested for 20 minutes. A coverglass was  
632 gently applied and one side was flooded with Ryu flagellum stain (Remel), then allowed to dry  
633 for 2 hours at room temperature. Slides were observed by light microscopy at 1000x total  
634 magnification on an upright AxioImager Z1 (Zeiss).

### 635 *SDS-PAGE and Immunoblotting*

636 Cells from an overnight culture were subcultured into fresh medium and grown at 37°C  
637 (30°C for *B. thailandensis*) to an OD<sub>600nm</sub> of 0.4, then exposed to various concentrations of  
638 rhamnose for 3 hours. Soluble protein was isolated first by sonicating the cells in TNG Buffer  
639 (100 mM Tris-HCl, 150 mM NaCl, 10% glycerol, pH 7.4) then by centrifugation at 15 000g for  
640 20 minutes. Following boiling denaturation in SDS loading buffer (50 mM Tris-HCl, 2% SDS,  
641 0.2% bromophenol blue, 20% glycerol, 100 mM DTT, pH 6.8), samples were run on an 8%  
642 Tris/glycine gel. To ensure equal loading, 20 µg protein was loaded per well (as determined by  
643 NanoDrop) and gels were run in duplicate (one for immunoblot, and another for Coomassie  
644 staining). Protein was transferred by iBlot to a PVDF membrane, blocked in 5% skim milk-  
645 TBST (150 mM NaCl, 10 mM Tris-HCl, 0.5% Tween-20, pH 7.5) at room temperature for 1  
646 hour, then probed with a 1:2 000 dilution of primary α-Cas9 antibody (ThermoFisher 10C11-

647 A12) in 5% skim milk-TBST overnight at 4°C. Following washes, the blot was probed with a  
648 1:20 000 dilution of secondary antibody linked to alkaline phosphatase (ThermoFisher G-21060)  
649 in 5% skim milk-TBST for 1 hour at room temperature. Protein was detected by incubation with  
650 a solution of NBT/BCIP (Roche) as per the manufacturer's protocol.

### 651 *RNA extraction and Reverse Transcription quantitative PCR (RT-qPCR) analysis*

652 Cells from an overnight culture were subcultured at an OD<sub>600nm</sub> of 0.01 into fresh  
653 medium with antibiotic and rhamnose, as necessary, and grown for 8 hours. Cells were harvested  
654 by centrifugation (3 minutes at 4600xg) and pellets were stored at -80°C until RNA extraction.  
655 RNA was purified and DNase treated using the Ribopure bacteria kit (Ambion) with extended  
656 DNase treatment (2 hours). RNA quality was verified by running on a 2% agarose gel. cDNA  
657 was synthesized with the iScript Reverse Transcriptase kit (Bio-Rad) and qPCR was performed  
658 using iQ SYBR Green mastermix (Bio-rad) on a CFX96 Touch Real-Time PCR Detection  
659 System (Bio-Rad). Primer efficiency was determined for each primer set and efficiencies  
660 between 95% and 105% were deemed acceptable. Data was analyzed using the comparative C<sub>T</sub>  
661 method (Livak and Schmittgen, 2001; Schmittgen and Livak, 2008). Genes were normalized to a  
662 commonly used reference gene, the RNA polymerase sigma factor *sigE* (BCAM0918) (O'Grady  
663 et al., 2009; Wong et al., 2018).

664

### 665 **Acknowledgements**

666 This work was financially supported by grants from the Cystic Fibrosis Foundation,  
667 Cystic Fibrosis Canada, and the Natural Sciences and Engineering Research Council of Canada

668 (NSERC) to STC; AMH was supported by grants from the Canadian Institutes of Health  
669 Research (CIHR) and Cystic Fibrosis Canada.

670 The authors are grateful to Eric Déziel from the Institut National de la Recherche  
671 Scientifique – Institut Armand-Frappier for providing the miniCTX1 integration vector.

672

### 673 **Conflict of Interest Statement**

674 The authors declare no conflict of interest.

675

### 676 **References**

677 Bikard, D., Jiang, W., Samai, P., Hochschild, A., Zhang, F., and Marraffini, L.A. (2013).  
678 Programmable repression and activation of bacterial gene expression using an engineered  
679 CRISPR-Cas system. *Nucleic Acids Res.* *41*, 7429–7437.

680 Cardona, S.T., and Valvano, M.A. (2005). An expression vector containing a rhamnose-  
681 inducible promoter provides tightly regulated gene expression in *Burkholderia cenocepacia*.  
682 *Plasmid* *54*, 219–228.

683 Chapalain, A., Groleau, M.-C., Le Guillouzer, S., Miomandre, A., Vial, L., Milot, S., and  
684 Déziel, E. (2017). Interplay between 4-Hydroxy-3-Methyl-2-Alkylquinoline and N-Acyl-  
685 Homoserine Lactone Signaling in a *Burkholderia cepacia* Complex Clinical Strain. *Front.*  
686 *Microbiol.* *8*, 1021.

687 Cho, S., Choe, D., Lee, E., Kim, S.C., Palsson, B., and Cho, B.-K. (2018). High-Level  
688 dCas9 Expression Induces Abnormal Cell Morphology in *Escherichia coli*. *ACS Synth. Biol.*

689 Cho, S.W., Kim, S., Kim, J.M., and Kim, J.-S. (2013). Targeted genome engineering in  
690 human cells with the Cas9 RNA-guided endonuclease. *Nat. Biotechnol.* *31*, 230–232.

691 Choi, K.-H., and Schweizer, H.P. (2006). mini-Tn7 insertion in bacteria with single  
692 attTn7 sites: example *Pseudomonas aeruginosa*. *Nat. Protoc.* *1*, 153–161.

693 Choi, K.H., Gaynor, J.B., White, K.G., Lopez, C., Bosio, C.M., Karkhoff-Schweizer,  
694 R.R., and Schweizer, H.P. (2005). A Tn7-based broad-range bacterial cloning and expression  
695 system. *Nat.Methods* *2*, 443–448.

696 Choi, K.H., DeShazer, D., and Schweizer, H.P. (2006). mini-Tn7 insertion in bacteria  
697 with multiple glmS-linked attTn7 sites: example *Burkholderia mallei* ATCC 23344. *Nat. Protoc.*  
698 *1*, 162–169.

699 Choi, K.H., Mima, T., Casart, Y., Rholl, D., Kumar, A., Beacham, I.R., and Schweizer,  
700 H.P. (2008). Genetic tools for select-agent-compliant manipulation of *Burkholderia*  
701 *pseudomallei*. *Appl. Environ. Microbiol.* *74*, 1064–1075.

702 Choudhary, E., Thakur, P., Pareek, M., and Agarwal, N. (2015). Gene silencing by  
703 CRISPR interference in mycobacteria. *Nat. Commun.* *6*, ncomms7267.

704 Cui, L., Vigouroux, A., Rousset, F., Varet, H., Khanna, V., and Bikard, D. (2018). A  
705 CRISPRi screen in *E. coli* reveals sequence-specific toxicity of dCas9. *Nat. Commun.* *9*, 1912.

706 Datsenko, K.A., and Wanner, B.L. (2000). One-step inactivation of chromosomal genes  
707 in *Escherichia coli* K-12 using PCR products. *Proc Natl Acad Sci U S A* *97*, 6640–6645.

708 Depoorter, E., Bull, M.J., Peeters, C., Coenye, T., Vandamme, P., and Mahenthiralingam,  
709 E. (2016). Burkholderia: an update on taxonomy and biotechnological potential as antibiotic  
710 producers. *Appl. Microbiol. Biotechnol.* *100*, 5215–5229.

711 Eberl, L., and Vandamme, P. (2016). Members of the genus *Burkholderia*: good and bad  
712 guys. *F1000Research* *5*, 1007.

713 Flanagan, R.S., Aubert, D., Kooi, C., Sokol, P.A., and Valvano, M.A. (2007).  
714 *Burkholderia cenocepacia* requires a periplasmic HtrA protease for growth under thermal and  
715 osmotic stress and for survival *in vivo*. *Infect. Immun.* *75*, 1679–1689.

716 Flanagan, R.S., Linn, T., and Valvano, M.A. (2008). A system for the construction of  
717 targeted unmarked gene deletions in the genus *Burkholderia*. *Environ. Microbiol.* *10*, 1652–  
718 1660.

719 Francis, N.R., Irikura, V.M., Yamaguchi, S., DeRosier, D.J., and Macnab, R.M. (1992).  
720 Localization of the *Salmonella typhimurium* flagellar switch protein FliG to the cytoplasmic M-  
721 ring face of the basal body. *Proc. Natl. Acad. Sci.* *89*, 6304–6308.

722 Funston, S.J., Tsaousi, K., Smyth, T.J., Twigg, M.S., Marchant, R., and Banat, I.M.  
723 (2017). Enhanced rhamnolipid production in *Burkholderia thailandensis* transposon knockout  
724 strains deficient in polyhydroxyalkanoate (PHA) synthesis. *Appl. Microbiol. Biotechnol.* *101*,  
725 8443–8454.

726 Hoang, T.T., Kutchma, A.J., Becher, A., and Schweizer, H.P. (2000). Integration-  
727 proficient plasmids for *Pseudomonas aeruginosa*: site-specific integration and use for  
728 engineering of reporter and expression strains. *Plasmid* *43*, 59–72.



729 Hogan, A.M., Scoffone, V.C., Makarov, V., Gislason, A.S., Tesfu, H., Stietz, M.S.,  
730 Brassinga, A.K.C., Domaratzki, M., Li, X., Azzalin, A., et al. (2018). Competitive Fitness of  
731 Essential Gene Knockdowns Reveals a Broad-Spectrum Antibacterial Inhibitor of the Cell  
732 Division Protein FtsZ. *Antimicrob. Agents Chemother.* *62*.

733 Howe, C., Sampath, A., and Spotnitz, M. (1971). The pseudomallei group: a review. *J.*  
734 *Infect. Dis.* *124*, 598–606.

735 Howe, F.S., Russell, A., Lamstaes, A.R., El-Sagheer, A., Nair, A., Brown, T., and Mellor,  
736 J. (2017). CRISPRi is not strand-specific at all loci and redefines the transcriptional landscape.  
737 *ELife* *6*.

738 Jones, D.L., Leroy, P., Unoson, C., Fange, D., Čurić, V., Lawson, M.J., and Elf, J.  
739 (2017). Kinetics of dCas9 target search in *Escherichia coli*. *Science* *357*, 1420–1424.

740 Josephs, E.A., Kocak, D.D., Fitzgibbon, C.J., McMenemy, J., Gersbach, C.A., and  
741 Marszalek, P.E. (2015). Structure and specificity of the RNA-guided endonuclease Cas9 during  
742 DNA interrogation, target binding and cleavage. *Nucleic Acids Res.* *43*, 8924–8941.

743 Judson, N., and Mekalanos, J.J. (2000). TnAraOut, a transposon-based approach to  
744 identify and characterize essential bacterial genes. *Nat Biotechnol* *18*, 740–745.

745 Kenna, D.T.D., Lilley, D., Coward, A., Martin, K., Perry, C., Pike, R., Hill, R., and  
746 Turton, J.F. (2017). Prevalence of *Burkholderia* species, including members of *Burkholderia*  
747 *cepacia* complex, among UK cystic and non-cystic fibrosis patients. *J. Med. Microbiol.* *66*, 490–  
748 501.

749 Komatsu, H., Hayashi, F., Sasa, M., Shikata, K., Yamaguchi, S., Namba, K., and  
750 Oosawa, K. (2016). Genetic analysis of revertants isolated from the rod-fragile fliF mutant of  
751 *Salmonella*. *Biophys. Physicobiology* *13*, 13–25.

752 Kumar, B., and Cardona, S.T. (2016). Synthetic Cystic Fibrosis Sputum Medium  
753 Regulates Flagellar Biosynthesis through the flhF Gene in *Burkholderia cenocepacia*. *Front.*  
754 *Cell. Infect. Microbiol.* *6*, 65.

755 Le Guillouzer, S., Groleau, M.-C., and Déziel, E. (2017). The Complex Quorum Sensing  
756 Circuitry of *Burkholderia thailandensis* Is Both Hierarchically and Homeostatically Organized.  
757 *MBio* *8*.

758 Lee, H.H., Ostrov, N., Wong, B.G., Gold, M.A., Khalil, A.S., and Church, G.M. (2019).  
759 Functional genomics of the rapidly replicating bacterium *Vibrio natriegens* by CRISPRi. *Nat.*  
760 *Microbiol.*

761 Liu, X., Gallay, C., Kjos, M., Domenech, A., Slager, J., van Kessel, S.P., Knoops, K.,  
762 Sorg, R.A., Zhang, J.-R., and Veening, J.-W. (2017). High-throughput CRISPRi phenotyping  
763 identifies new essential genes in *Streptococcus pneumoniae*. *Mol. Syst. Biol.* *13*, 931.

764 Livak, K.J., and Schmittgen, T.D. (2001). Analysis of relative gene expression data using  
765 real-time quantitative PCR and the 2(-Delta Delta C(T)) Method. *Methods San Diego Calif* *25*,  
766 402–408.

767 Mahenthiralingam, E., Urban, T.A., and Goldberg, J.B. (2005). The multifarious,  
768 multireplicon *Burkholderia cepacia* complex. *Nat. Rev. Microbiol.* *3*, 144–156.

769 Mao, D., Bushin, L.B., Moon, K., Wu, Y., and Seyedsayamdost, M.R. (2017). Discovery  
770 of scmR as a global regulator of secondary metabolism and virulence in *Burkholderia*  
771 *thailandensis* E264. Proc. Natl. Acad. Sci. U. S. A. *114*, E2920–E2928.

772 Nally, E., Groah, S.L., Pérez-Losada, M., Caldovic, L., Ljungberg, I., Chandel, N.J.,  
773 Sprague, B., Hsieh, M.H., and Pohl, H.G. (2018). Identification of *Burkholderia fungorum* in the  
774 urine of an individual with spinal cord injury and augmentation cystoplasty using 16S  
775 sequencing: copathogen or innocent bystander? Spinal Cord Ser. Cases *4*, 85.

776 O’Grady, E.P., Viteri, D.F., Malott, R.J., and Sokol, P.A. (2009). Reciprocal regulation  
777 by the CepIR and CciIR quorum sensing systems in *Burkholderia cenocepacia*. BMC Genomics  
778 *10*.

779 Ortega, X.P., Cardona, S.T., Brown, A.R., Loutet, S.A., Flannagan, R.S., Campopiano,  
780 D.J., Govan, J.R., and Valvano, M.A. (2007). A putative gene cluster for aminoarabinose  
781 biosynthesis is essential for *Burkholderia cenocepacia* viability. J. Bacteriol. *189*, 3639–3644.

782 Peters, J.M., Colavin, A., Shi, H., Czarny, T.L., Larson, M.H., Wong, S., Hawkins, J.S.,  
783 Lu, C.H., Koo, B.M., Marta, E., et al. (2016). A comprehensive, CRISPR-based functional  
784 analysis of essential genes in bacteria. Cell *165*, 1493–1506.

785 Peters, J.M., Koo, B.-M., Patino, R., Heussler, G.E., Hearne, C.C., Qu, J., Inclan, Y.F.,  
786 Hawkins, J.S., Lu, C.H.S., Silvis, M.R., et al. (2019). Enabling genetic analysis of diverse  
787 bacteria with Mobile-CRISPRi. Nat. Microbiol. *4*, 244.

788 Pribytkova, T., Lightly, T.J., Kumar, B., Bernier, S.P., Sorensen, J.L., Surette, M.G., and  
789 Cardona, S.T. (2014). The attenuated virulence of a *Burkholderia cenocepacia* paaABCDE

790 mutant is due to inhibition of quorum sensing by release of phenylacetic acid. *Mol. Microbiol.*  
791 *94*, 522–536.

792 Qi, L.S., Larson, M.H., Gilbert, L.A., Doudna, J.A., Weissman, J.S., Arkin, A.P., and  
793 Lim, W.A. (2013). Repurposing CRISPR as an RNA-guided platform for sequence-specific  
794 control of gene expression. *Cell* *152*, 1173–1183.

795 Rhodes, K.A., and Schweizer, H.P. (2016). Antibiotic resistance in *Burkholderia* species.  
796 *Drug Resist. Updat.* *28*, 82–90.

797 Rock, J.M., Hopkins, F.F., Chavez, A., Diallo, M., Chase, M.R., Gerrick, E.R., Pritchard,  
798 J.R., Church, G.M., Rubin, E.J., Sasseti, C.M., et al. (2017). Programmable transcriptional  
799 repression in mycobacteria using an orthogonal CRISPR interference platform. *Nat. Microbiol.*  
800 *2*, 16274.

801 Schmittgen, T.D., and Livak, K.J. (2008). Analyzing real-time PCR data by the  
802 comparative C(T) method. *Nat. Protoc.* *3*, 1101–1108.

803 Siegele, D.A., and Hu, J.C. (1997). Gene expression from plasmids containing the  
804 *araBAD* promoter at subsaturating inducer concentrations represents mixed populations. *Proc*  
805 *Natl Acad Sci U S A* *94*, 8168–8172.

806 Tan, S.Z., Reisch, C.R., and Prather, K.L.J. (2018). A Robust CRISPRi Gene Repression  
807 System in *Pseudomonas*. *J. Bacteriol.* *200*, e00575-17.

808 Teufel, R., Mascaraque, V., Ismail, W., Voss, M., Perera, J., Eisenreich, W., Haehnel,  
809 W., and Fuchs, G. (2010). Bacterial phenylalanine and phenylacetate catabolic pathway revealed.  
810 *Proc. Natl. Acad. Sci. U. S. A.* *107*, 14390–14395.

811 Tomich, M., Herfst, C.A., Golden, J.W., and Mohr, C.D. (2002). Role of flagella in host  
812 cell invasion by *Burkholderia cepacia*. *Infect. Immun.* *70*, 1799–1806.

813 Wong, Y.-C., Abd El Ghany, M., Ghazzali, R.N.M., Yap, S.-J., Hoh, C.-C., Pain, A., and  
814 Nathan, S. (2018). Genetic Determinants Associated With *in Vivo* Survival of *Burkholderia*  
815 *cenocepacia* in the *Caenorhabditis elegans* Model. *Front. Microbiol.* *9*, 1118.

816 Yang, P., Zhang, M., and Elsas, J.D. van (2017). Role of flagella and type four pili in the  
817 co-migration of *Burkholderia terrae* BS001 with fungal hyphae through soil. *Sci. Rep.* *7*, 2997.

818

819

820
